1 Thalamic bursts modulate cortical synchrony locally to switch between states of global functional  
2 connectivity in a cognitive task

3

4

5

6

7

8

9 \*Oscar Portoles<sup>1,2</sup>, Manuel Blesa<sup>3</sup>, Marieke van Vugt<sup>1</sup>, Ming Cao<sup>2</sup>, Jelmer P. Borst<sup>1</sup>

10

<sup>1</sup>) Bernoulli Institute for Mathematics, Computer Science and Artificial Intelligence, Faculty of  
Science and Engineering, University of Groningen, Groningen, 9747 AG, The Netherlands

<sup>2</sup>) Engineering and Technology Institute Groningen, Faculty of Science and Engineering, University  
of Groningen, Groningen, 9747 AG, The Netherlands

<sup>3</sup>) MRC Centre for Reproductive Health, University of Edinburgh, Edinburgh EH16 4TJ, UK

**Corresponding Author:**

\*Oscar Portoles:

o.portoles.marin@rug.nl; +31 503635256; Nijenborgh, 9, 9747 AG, Groningen, The Netherlands

11

12 **This PDF file includes:**

13 abstract,  
14 author summary,  
15 introduction,  
16 results (with figures),  
17 discussion,  
18 methods,  
19 acknowledgments,  
20 author contributions,  
21 declaration of interests,  
22 supplemental information,  
23 references

## 24 **Abstract**

25 Performing a cognitive task requires going through a sequence of functionally diverse  
26 stages. Although it is typically assumed that these stages are characterized by distinct  
27 states of cortical synchrony that are triggered by sub-cortical events, little reported  
28 evidence supports this hypothesis. To test this hypothesis, we first identified cognitive  
29 stages in single-trial MEG data of an associative recognition task, showing with a novel  
30 method that each stage begins with local modulations of synchrony followed by a state of  
31 directed functional connectivity. Second, we developed the first whole-brain model that can  
32 simulate cortical synchrony throughout a task. The model suggests that the observed  
33 synchrony is caused by thalamocortical bursts at the onset of each stage, targeted at  
34 cortical synapses and interacting with the structural anatomical connectivity. These  
35 findings confirm that cognitive stages are defined by distinct states of cortical synchrony  
36 and explains the network-level mechanisms necessary for reaching stage-dependent  
37 synchrony states.

38

## 39 **Author summary**

40 A novel machine-learning method was applied to unveil the dynamics of local and cortex-wide  
41 neural coordination underlying the fundamental cognitive processes involved in a memory task. To  
42 explain how neural activity – and ultimately behavior – was coordinated throughout the task, we  
43 developed a whole-brain model that incorporates cognitive mechanisms, anatomy, and neural  
44 biophysics. Similar models are used with resting state data, however, simulating a cognitive task  
45 remained elusive. The model showed that sub-cortical pulses at the onset of cognitive processes – as  
46 hypothesized by cognitive and neurophysiological theories – were sufficient to switch between the  
47 states of neural coordination observed. These findings have implications to understand goal-directed  
48 cognitive processing and the mechanisms to reach states of neural coordination.

49

## 50 **Key words**

51 cognitive stages, cognitive processes, associative memory, MEG, functional connectivity,  
52 synchronization, hidden Markov model, brain network, biophysical model, whole-brain model,  
53 Kuramoto model

54

## 55 **Introduction**

56 Already in the 19<sup>th</sup> century, Donders hypothesized that information processing in the brain proceeds  
57 through a sequence of fundamental cognitive stages with different functions such as visual  
58 encoding, memory retrieval, and decision making [1]. Initially, cognitive stages were investigated  
59 with behavioral metrics like reaction time (e.g., [2]). Over the past decade, neuroimaging analyses  
60 have begun to uncover the neural correlates of these cognitive stages (e.g., [3]).

61

62 The dominant view is that cognitive stages require specific patterns of neural coordination across  
63 the cortex [3–5]. The transition from one cognitive stage to the next is thought to be driven by the  
64 basal-ganglia-thalamus (BGT) system which sets new states of cortical coordination [6–8]. The  
65 striatum monitors the current state of the cortex, and based on a comparison to predefined states,  
66 selects and triggers the next cognitive stage. The role of the BGT system modulating cortical  
67 coordination is supported by animal studies, intracranial recordings, and neural models [9–14].  
68 However, the network-level mechanisms required to reach a new state of cortical coordination from  
69 subcortical inputs are poorly understood.

70

71

72 To give a detailed account of these mechanisms, one first needs to characterize the different states  
73 of neural coordination within the sequence of cognitive stages. We measured neural activity with

74 cortically projected magnetoencephalographic (MEG) recordings as these have a sufficiently fine  
75 temporal resolution to measure cognitive stages, as well as adequate spatial resolution. However,  
76 cognitive stages have high temporal variability – that is, stages typically have a different duration  
77 on each trial of an experimental task – which makes it difficult to measure neural coordination. To  
78 overcome this problem, we used a machine learning method that identifies the onsets of cognitive  
79 stages on a trial-by-trial basis [15]. Afterwards, the identified stage onsets were used to time-lock  
80 the measures of neural coordination within regions (local synchrony) and between regions  
81 (functional connectivity, FC), as there are concurrent changes at both spatial scales [16,17].

82

83 The machine learning method used to identify cognitive stages combines multivariate pattern  
84 analysis with a Hidden semi-Markov Model (HSMM-MVPA). The HSMM-MVPA method searches  
85 in each trial for a sequence of short-lived modulations of MEG amplitude (hereafter called *bumps*,  
86 following the original paper [15]) that have a consistent topology across trials. These bumps signify  
87 the onset of cognitive stages, and are thought to be triggered by the BGT system. Previously this  
88 method has been used successfully to, for example, identify the cognitive stages that are affected by  
89 task manipulations such as difficulty, stage insertion, and evidence accumulation for decisions  
90 [4,5,15,18].

91

92 To understand how events from the BGT system can cause switches between states of neural  
93 coordination – and thus between cognitive stages – we build upon generative whole-brain  
94 biophysical models of large-scale activity (GWBM) that have been used to explain the dynamics of  
95 neural coordination at rest [19]. GWBMs reduce the whole-brain network of neurons and synapses  
96 to a smaller network that still incorporates the most relevant principles of neural dynamics. The  
97 nodes of such a network describe the macroscopic activity within a region, while the links reflect  
98 the neural fibers that connect these regions (i.e. structural connectivity).

99



100 GWBMs of resting state indicate that time-resolved patterns of neural coordination are related to the  
101 anatomical structure of the brain and that these patterns evolve without requiring any input (a  
102 phenomenon referred to as *metastable coordination*; [17,19]. Such coordination dynamics are  
103 thought to provide an optimal mechanism for simultaneously integrating and segregating  
104 information that allows the system to adapt quickly or alternatively, to persist in a given state [20].  
105 While this is sufficient to explain resting-state data, cognitive tasks require specific, controlled  
106 sequences of coordination states.

107

108 Here, we explored a GWBM in which inputs from the BGT system modulated local connectivity  
109 strength briefly at the onset of cognitive stages, as suggested by cognitive theories and  
110 electrophysiology measurements [6–14]. In other complex networks with similar dynamics as the  
111 brain, such local perturbations can, in turn, produce controlled switches between global states [21].  
112 Similarly, even though the inputs from the BGT system only triggered direct changes in local  
113 connectivity strength, we observed transient modulations of local synchrony and switches to the  
114 targeted states of directed functional connectivity that lasted until the next input. When there were  
115 no further inputs from the BGT system, neural coordination returned to resting-state patterns after  
116 tens of seconds. These results matched the observed neural coordination throughout the cognitive  
117 stages in the empirical data. Finally, we used the GWBM to determine the importance of each brain  
118 region in facilitating the switches between states of coordination.

119

## 120 **Results**

### 121 **Five cognitive stages in an associative memory task.**

122 We re-analyzed MEG data from an associative memory recognition task with 18 participants [3].  
123 We chose this task because associative recognition memory involves a rich variety in cognitive

124 stages that have also been widely studied [3,5,15,22,23]. The task consisted of a self-directed  
125 learning phase during which participants memorized 32 word pairs and a test phase. In the test  
126 phase – which we analyzed here – participants were again presented with word pairs. These could  
127 be *target* pairs from the learning phase or *re-paired foil* pairs, which consisted of the same words  
128 paired differently (e.g., if the participants learned apple-tree and month-house, a foil pair could be  
129 apple-house). Participants were asked to indicate as quickly and accurately as possible with a key  
130 press if it was a learned pair or a re-paired foil. Only correct responses were included in our  
131 analysis. We were interested in the evolution of neural coordination along with the cognitive stages  
132 involved in performing the task, and in particular in how the brain switches between these  
133 consecutive states of functional neural coordination.

134

135 As the goal is to develop a cortical model, the MEG signals were projected onto 5,124 cortical  
136 sources using the structural MRI of each participant with minimum-norm estimation [3]. The  
137 resulting cortical activity was parcellated and averaged into time-series for 68 cortical regions  
138 following the Desikan-Killiany atlas [24]. Next, HSMM-MVPA was used to estimate the timing of  
139 bumps that indicate the onset of cognitive stages in each trial. All trials were assumed to go through  
140 the same sequence of stages as in previous studies [3,4,15]. Thus, bumps were assumed to have the  
141 same spatial topology across trials, but trial-to-trial variable temporal location. Nevertheless, the  
142 HSMM-MVPA can cope relatively well with extra bumps in some trials [15]. The intervals between  
143 stimulus-onset-to-bump, bump-to-bump, and bump-to-response constitute the cognitive stages. A  
144 leave-one-subject-out cross validation method showed that the MEG data were best explained by a  
145 HSMM-MVPA model with four bumps, which corresponds to five cognitive stages (Figure 1A).

146

147 Following previous work on associative recognition [3,5,15], we interpreted the five cognitive  
148 stages as follows: pre-encoding, encoding of visual information, memory retrieval, decision  
149 making, and motor response. We did not analyze the pre-encoding stage as it is mostly driven by the

150 task stimulus and not by events from the BGT system that produce the transitions between cognitive  
 151 stages. The retrieval and motor stages were longer and had larger across-trial variability than the  
 152 encoding and decision stages (Figure 1A and E).

153

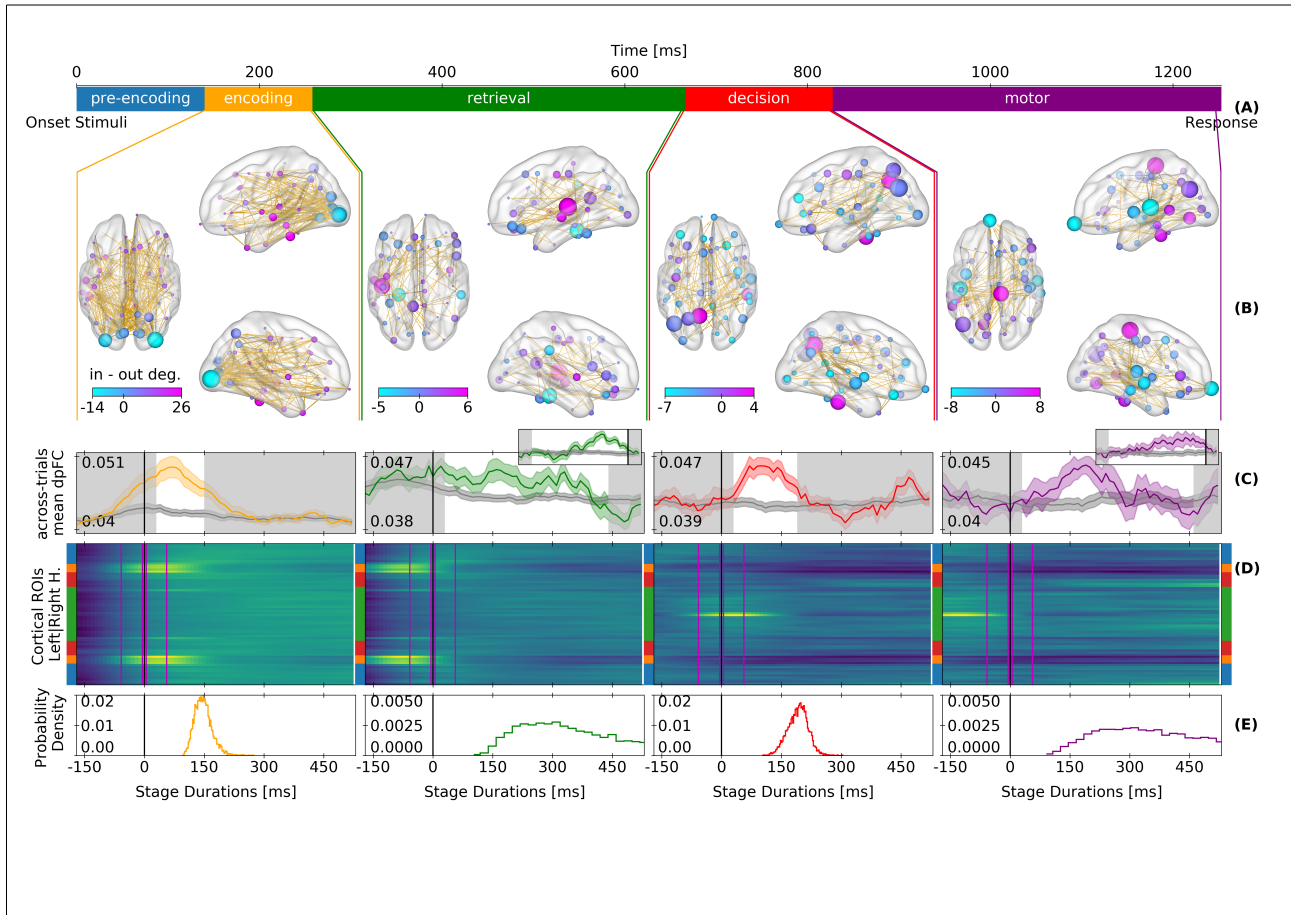

**Figure 1. Theta-band MEG local synchrony and directed functional connectivity by cognitive**

**stages.** (A) Cognitive stages derived with the HSMM-MVPA along with their median durations.

(B) Significant directed functional connectivity throughout the stage (*within-stage dpFC*). Links go from phase-ahead to phase-behind regions. The nodes represent the nodal degree (size) and the difference between phase-ahead and phase-behind links (color).

(C) Directed functional connectivity time-locked at the onset of the stages (*across-trials dpFC*). Colored (dark gray) line: average across links with (without) significant across-trial dpFC at the current stage; Shading:

standard error of the mean across subjects. Black horizontal lines are the onset of the stages. The

standard error of the mean across subjects. Black horizontal lines are the onset of the stages. The

white background spans the median stage duration. Retrieval and response insets: Directed functional connectivity time-locked to the onsets of the decision stage and to the end-of-trial response, respectively (D) Across-trials averaged local synchrony (z-scored envelope of amplitudes) time-locked at the onset of the stages. Y-axis represents cortical regions – blue: temporal, orange: occipital, red: parietal, and green: frontal. Magenta lines: time windows to measure the relative change in local coordination at the onset of the stages. (E) Histogram of stage durations derived with the HSMM-MVPA.

154

155 **Different local synchrony and directed functional connectivity states between**  
156 **stages.**

157 Next, we measured neural coordination in the discovered stages. We focused on coordination of  
158 theta band oscillations (4-8 Hz), for several reasons: we previously found synchrony patterns in this  
159 frequency band to vary across task stages [4]; theta oscillations have been related to cognitive  
160 processes such as attention, memory, control, and decision making [25–28]; the phase of theta  
161 oscillations is known to modulate the activity in higher frequency bands [26,29]; local modulations  
162 of theta-band activity are hypothesized to mediate changes in long-range functional connectivity  
163 [30]; and thalamic activity modulates cortical theta band activity [31].

164

165 Directed FC in the theta band was operationalized by means of the directed phase-lag index [32]  
166 (dpFC). A significant dpFC indicates that the phase in one region is consistently ahead or behind  
167 another region. The significance of dpFC was obtained using 200 surrogate data sets with random  
168 circular shifts of the original phases. We measured first *within-stage dpFC* to capture directed FC  
169 states that are constant from the start to the end of a cognitive stage. Figure 1B shows the links with  
170 significant within-stage dpFC, as well as the local difference between phase-ahead and phase-  
171 behind links (node color) and the total number of links regardless of their direction (node size).

172 Next, we measured *across-trial dpFC* of the significant links in a stage to reveal the temporal  
173 evolution of directed FC during the stage (Figure 1C). Across-trial dpFC was calculated sample-by-  
174 sample with the trials time-locked to the onset of each stage.

175

176 Across-trial dpFC revealed that functional states of directed FC switch at the transition between  
177 cognitive stages. These switches are visible because across-trial dpFC takes into account the trial-  
178 to-trial temporal variability of the cognitive stages as revealed by the HSMM-MVPA analysis. For  
179 example, for the memory retrieval stage, across-trial dpFC seems to fade halfway through.

180 However, when across-trial dpFC is time-locked to the onset of the next stage – the decision stage –  
181 dpFC for memory retrieval materializes until shortly before the decision stage (see the insets in  
182 Figure 1). This illustrates why the HSMM-MVPA analysis is crucial: otherwise dpFC would appear  
183 to fade quickly after stimulus onset, while that is not the case when first isolating cognitive stages.

184

185 Local synchrony was operationalized as the envelope of the theta band analytic signals in each  
186 region, which indicates the degree of synchronous neural activity within a region. The envelopes  
187 were z-scored over time and then averaged across trials and participants. Across-trial averages were  
188 time-locked to the onset of cognitive stages which gave a time course of local synchrony for each  
189 stage (Figure 1D). This showed that the local modulations of synchrony occurred only briefly at the  
190 start of each stage, and involved different regions depending on the cognitive operations involved in  
191 that stage.

192

193 As expected, each stage had a different neural coordination pattern. In the visual encoding stage,  
194 occipital and left-temporal regions showed local synchrony and dpFC which might facilitate the  
195 transfer of visual information to the medial temporal lobe and the hippocampus to start a retrieval  
196 process [23]. The encoding of information is controlled by a large fronto-posterior, fronto-lateral  
197 network [25,26]. During the memory retrieval stage, local synchrony at occipital and temporal

198 regions is reduced. dpFC now happens mostly between left-medial-temporal and frontal regions,  
199 whose coordination is required for memory tasks [23,33]. At the onset of decision making the  
200 frontal regions begin to synchronize locally. The decision process is mediated by fronto-parietal  
201 dpFC [27], and dpFC between temporal and parietal regions dpFC to reinsert the memory retrieved  
202 into the left-parietal cortex [23]. Finally, at the motor stage a large dpFC network appears between  
203 motor, temporal, left-parietal, and pre-frontal regions. This complex network has previously been  
204 associated with motor preparation, action reevaluation, decision, and cognitive control [27,28,34],  
205 in line with the idea that the action is reevaluated during the motor response [35].

206  
207 Together, these analyses unveiled that right at the onset of a cognitive stage there is a reorganization  
208 of neural coordination in the cortex. Whereas the change in local synchrony was only brief, dpFC  
209 lasted throughout the cognitive stage, indicating that short modulations of local synchrony can have  
210 persistent global effects. Next, we used a GWBM to investigate the mechanism underlying this.

### 211 **Generative large-scale whole-brain model (GWBM)**

212 In order to integrate cognitive stages and neural coordination into one framework along with neural  
213 anatomy and neural dynamics, we used a parsimonious GWBM that describes within- and between-  
214 region modulations of synchrony. Previously, we have used this model to demonstrate that  
215 modulations of local synchrony are related to time-resolved FC during resting state [17].

216  
217 This GWBM is a low-dimensional reduction of a network-of-networks of Kuramoto oscillators  
218 [36]. Kuramoto oscillators describe the dynamics of synchrony in biological systems including  
219 neural networks [19,37,38]. Each sub-network represents a cortical region. All units in a region are  
220 assumed to be fully and instantly connected, while connections between regions are weighted and  
221 delayed by the density and length of the neural fibers in MRI-derived structural connectivity

222 networks. The regions in the GWBM were defined with the same parcellation atlas as the MEG data  
223 that we sought to model.

224

225 First, we set default values for local connectivity strength ( $L$  in Eq. 2, identical for all regions), and  
226 global scaling ( $G$  in Eq. 2 and Eq. 3) of the structural connectivity such that the model simulated  
227 resting-state coordination dynamics in the theta-band [19,39]. Resting-state dynamics are  
228 characterized by fluctuations over time of the local and global synchrony as well as time-resolved  
229 FC patterns (i.e. local and global metastability) [17,19,39]. These dynamical properties of resting  
230 state neural coordination were identified with GWBMs simulated over a grid of  $L$  and  $G$  values. The  
231 identified  $L$  and  $G$  values displayed the most similar dynamics to local and global metastability in  
232 the grid search.(see Supplementary Figure 1A).

233

234 Next, we simulated the switching between cognitive states by adding short inputs (30 milliseconds)  
235 from the BGT system at the onset of cognitive stages. The rationale for using this mechanism  
236 derives from theories of cognition and data derived from electrophysiology. Specifically, cognitive  
237 theories state that the BGT system modulates cortical synchrony at the onset of cognitive stages via  
238 thalamocortical signals [6,22]. Electrophysiology has shown that thalamocortical neurons can  
239 indeed drive cortical activity [10,13] and establish FC [40,41]. These thalamocortical neurons tend  
240 to produce short burst of activity [42], which target pools of either excitatory or inhibitory cortical  
241 neurons specifically [12,43]. Therefore, our model simulated thalamocortical inputs as short pulses  
242 of increased or decreased local connectivity strength ( $L$  in Eq. 2) that represent transient  
243 modulations of excitatory or inhibitory synaptic activity [38].

244

245 To simulate the sequence of neural coordination states found in the MEG data, we estimated the  
246 required activity pulses simultaneously in all regions, stage-by-stage. The optimization scheme

247 maximized concurrently the fitness of local synchrony and within-stage dpFC, while minimizing  
248 the total magnitude of the pulses. The optimization was accomplished with the generalized island  
249 model for distributed evolutionary optimization which in relatively short time explores and exploits  
250 different areas of the parameter space simultaneously [44].

251

## 252 **Changes in local connectivity cause switches between global states of cognitive** 253 **coordination**

254 To assess how well the model simulated local synchrony, we measured the relative change in theta  
255 envelope before and after stage onset (magenta lines in Figure 1D). All model results were  
256 computed from 1000 models randomly selected from the top one percentile of models after the  
257 optimization. Relative changes in simulated and MEG envelopes were correlated significantly  
258 across different cortical regions (Spearman's  $\rho$  – encoding:  $0.552 \pm 0.00158$  SEM; retrieval:  $0.702$   
259  $\pm 0.000434$  SEM; decision:  $0.743 \pm 0.000683$  SEM; motor  $0.477 \pm 0.00151$  SEM; all p-values <  
260 0.05).

261

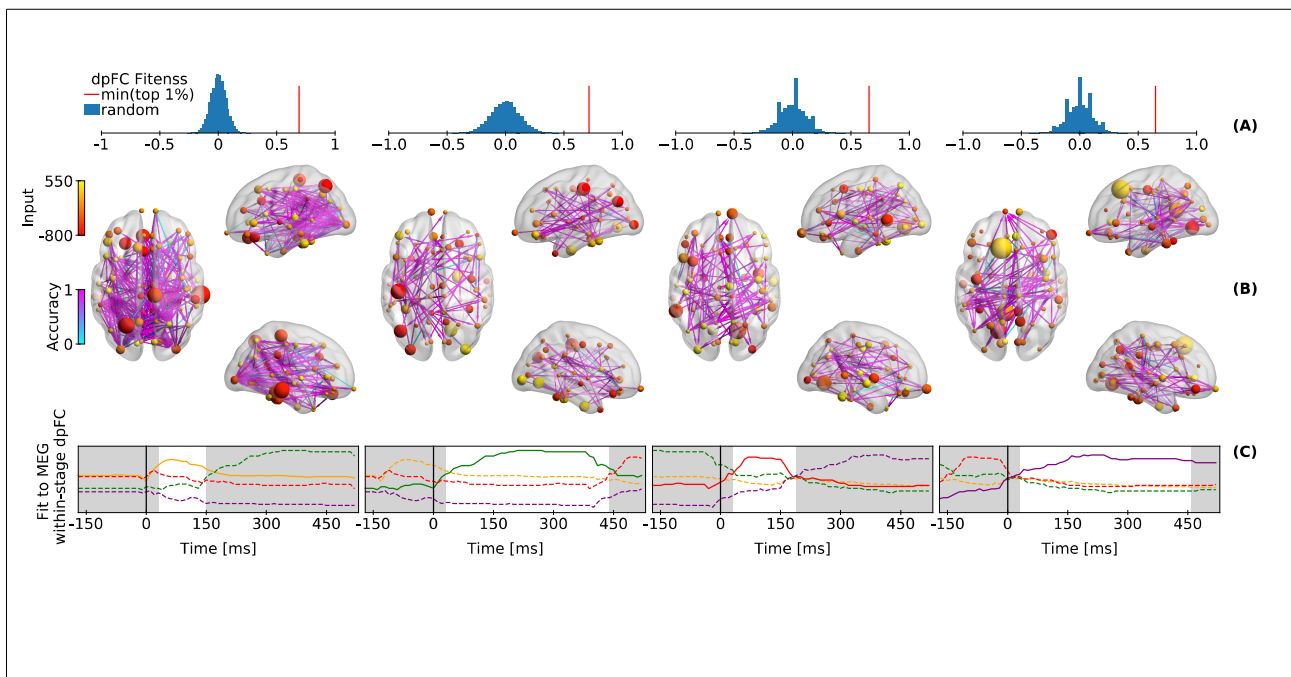



**Figure 2. Simulated directed functional connectivity.** (A) Blue histograms show the fitness between 20,000 randomly generated *within-stage dpFCs* and the MEG *within-stage dpFC*. The red line indicates the *within-stage dpFCs* fitness of the model with the lowest fitness index within the top 1 percentile of the optimized models. (B) Fitness of simulated-to-MEG *within-stage dpFC* is shown in cyan-purple grading over MEG links with significant *within-stage dpFC* (same as Figure 1B). The nodes indicate the relevance of a region for reaching a state of *within-stage dpFC* (size), and the pulse of local connectivity strength at the onset of the stage due to sub-cortical inputs (colors). These results show the averages of 1000 random picks from top ~1% of the optimizations. (C) Temporal evolution of simulated-to-MEG fitness of *within-stage dpFC* for the current stages (solid lines) compared to other stages (dashed). The white background spans the median stage duration. The color of the lines represent the different stages and follows Figure 1C.

262

263 Figure 2A compares the *within-stage dpFC* fitness of the *worst* model in the top one percentile to a  
264 distribution of the same fitness metric obtained with 20,000 random *within-stage dpFCs*, and shows  
265 that the model performs much better than chance. Figure 2B shows the fitness of *within-stage dpFC*  
266 at individual links. The fitness was quantified as the proportion of links with the same phase-lag  
267 direction as in the MEG data (encoding:  $0.697 \pm 0.00014$  SEM; retrieval:  $0.837 \pm 0.0016$  SEM;  
268 decision:  $0.749 \pm 0.00092$  SEM; motor:  $0.758 \pm 0.001$  SEM). Figure 2C compares the across-trial  
269 *dpFC* of the model to the MEG data over time. Each state of *dpFC* begins after the pulse that  
270 modulates local connectivity strength at the onset of the stage, and vanishes with the next onset  
271 (Figure 2C). The last state of *dpFC* – the motor response – vanishes slowly (in ~10 seconds), and  
272 the GWBM returns to resting-state coordination dynamics (Supplementary Figure 2).

273

274 Taken together, the GWBM showed that a short pulse of local connectivity strength at the onset of a  
275 cognitive stage can first cause a modulation of local synchrony and then a new state of *dpFC* that

276 lasts until the onset of the next stage (Figure 2C). If there is no subsequent cognitive stage, the  
277 GWBM returns to the coordination dynamics that are characteristic of the resting state.

278

## 279 **Relevance of regions to switch between functional states of coordination**

280 Not all regions in the GWBM are equally important for switching between states of dpFC. The  
281 relevance of a region increases with the size of the pulses and the strength of structural connectivity  
282 with other regions. The size of the nodes in Figure 2B indicates the relevance of a region for  
283 switching between states of dpFC. The absolute size of the pulses from the BGT predicts 22.52 %  
284 ( $\pm 0.096$  SEM) of the variance in the relevance of the nodes, while the interaction between the  
285 absolute size of these BGT pulses and the log-scaled strength of structural connectivity predicts  
286 25.98 % ( $\pm 0.12$  SEM) of the same variance.

287 This analysis shows that there are regions such as the left superior frontal region in the last stage  
288 that do not show dpFC, but that are still highly relevant for entering a state of high dpFC between  
289 other regions. This supports the mechanistic role of the superior frontal regions in exerting  
290 cognitive control [25,27] and highlights the complexity of interactions required for implementing  
291 changes in FC patterns.

292

## 293 **Discussion**

294 In this paper, we first analyzed the evolution of macroscopic neural coordination states across the  
295 cortex during an associative recognition memory task. Our analysis of MEG data showed that at the  
296 onset of fundamental cognitive stages there are transient modulations of local synchrony, which are  
297 directly followed by a new state of dpFC that persists until the next cognitive stage. Next, we used a  
298 generative model of whole brain activity (GWBM) with inputs from the basal-ganglia-thalamus  
299 system to explain these findings. The GWBM showed that short pulses that strengthen or weaken

300 local connectivity strength at the onset of cognitive stages were sufficient to cause the switch  
301 between states of neural coordination consistent with empirical data. In addition, the GWBM  
302 indicated which individual regions were most relevant for causing these switches.

303

### 304 **GWBM and the Basal Ganglia-Thalamus Circuit**

305 The GWBM that we developed in this paper has shown that inputs from the basal-ganglia-thalamus  
306 system at the onset of cognitive stages are sufficient to cause switches between cognitive stages.  
307 This role of the BGT system had been hypothesized by cognitive theories [6,22]. Direct evidence  
308 for thalamic modulations of cortical activity is limited to some cortical regions due to  
309 methodological constraints, such as the fact that it is challenging to record simultaneously from  
310 many sub-cortical and cortical areas with high temporal resolution [10,12,13,40]. Nevertheless, a  
311 recent meta-analysis has shown that the thalamus plays a critical role as a central hub that connects  
312 neighboring and distant regions to allow for cognitive functions [9], which is in line with the  
313 hypothesis that local thalamocortical inputs can mediate FC [14]. In addition, there is evidence for  
314 neural fibers connecting the thalamus with most cortical regions [45]. Our model provides  
315 additional support for both hypotheses: the BGT systems can trigger a switch between fundamental  
316 stages of cognition [6,22] and thalamic input modulates coordination of cortical activity according  
317 to cognitive demands [14].

318

319 Given our limited understanding of how the thalamus modulates cortical activity, we opted for a  
320 very simple representation of thalamocortical input. These inputs were short [40–42], targeted  
321 excitatory or inhibitory local connections [12,43], and came at the onset of cognitive stages [6,22].  
322 Such inputs drove the GWBM throughout the sequence of empirical local synchrony and dpFC  
323 states. Afterwards, the GWBM returned to resting state dynamics. In other words, a short

324 modulation of local excitation/inhibition modified the local synchrony and the phase of the local  
325 mean-field oscillation. This change in local mean-field phase set a new phase-lag relationship with  
326 other regions that vanished over time due to structural cortical interactions. This response to local  
327 perturbations suggests that cortical dynamics are metastable as many states of coordination can be  
328 reached, and the brain does not remain into a particular state in the absence of perturbations.  
329 Metastable dynamics are thought to allow for integrating and segregating information  
330 simultaneously, as well as for the flexibility of cognitive functions and behaviors [20].

331

332 Importantly, dpFC was not driven by thalamocortical inputs exclusively. Instead, the macroscopic  
333 connectivity structure of the brain also played an important role. The relevance of the structural  
334 connectivity was highlighted by the presence of regions with very low dpFC that turn out to be very  
335 important for coordinating other pairs of regions. One example of such regions is the left superior  
336 frontal region during the motor response stage, a region that has been related to cognitive control,  
337 attention, and decision making [25,27,28]. The role of structural connectivity for generating specific  
338 coordination patterns was first brought to light by GWBMs of resting-state dynamics [19]. In a  
339 previous study we have shown analytically that the strength of structural connectivity plays an  
340 important role in selectively coordinating regions by means of modulations of local connectivity  
341 strength [46]. Additionally, structural symmetries and time-delays might have influenced dpFC in  
342 our simulations [19,47,48].

343

344 There are other biological aspects that might be relevant for coordination of cortical activity that  
345 were not included here, including the delay over thalamocortical neurons [49], the dynamics of the  
346 synapses targeted by thalamocortical inputs [12], tonic activity in the thalamus [42], noise, or the  
347 state of cortical oscillations at the time of a thalamic input. Moreover, our measurement of directed  
348 FC has neglected zero-phase-lag coordination which can emerge from thalamocortical and cortico-

349 cortical loops [49]. However, while including these additional aspects might improve the fit of the  
350 model, the current model could already account for the data surprisingly well. Additionally, we have  
351 assumed that perturbations of cortical dynamics at the onset of cognitive stages come exclusively  
352 from the thalamus. However, there might be other regions such as the hypothalamus that modulate  
353 cortical activity in the same or another way that is not included in our model.

354

### 355 **Neural coordination across the cortex along a sequence of cognitive stages**

356 Our stage-by-stage analyses of neural coordination corroborates the hypothesis that the local  
357 modulations of phase synchrony in the theta-band mark a change in long-range functional  
358 connectivity and enable a new cognitive function [30]. Moreover, our results confirm the hypothesis  
359 that a new state of neural coordination is established at the onset of cognitive stages [6,22]. Our  
360 previous research has shown that alpha band FC also varies across cognitive stages [4], but cortical  
361 alpha has been found to lead thalamic activity rather than being caused by it [50], as is the case with  
362 theta [13].

363

364 To uncover neural coordination stage-by-stage it was crucial to account for the temporal variability  
365 of cognitive stages across trials using the HsMM-MVPA analysis. Only after correcting for this  
366 variability, our analyses showed that dpFC lasts throughout a cognitive stage and differs across  
367 stages. The corresponding states of dpFC had different length, strength, and topology. This diversity  
368 of properties might have biased some traditional metrics of neural coordination. For example, if one  
369 were interested in the FC at the interval between 250 and 600 milliseconds after stimulus onset –  
370 roughly the period of memory retrieval, this interval would contain elements of the encoding or  
371 decision stages. The first reason for this is the trial-by-trial variability in stage durations: in one trial  
372 encoding might last till 400 ms, while in another trial memory retrieval might already have finished

373 by 400 ms. Secondly, the retrieval stage has fewer and weaker connections than the encoding and  
374 decision stages in our study, which mean that these connections might have been missed altogether.  
375 These effects are worse the further one moves away from fixed time points (trial onset/response),  
376 which is one of the reasons that M/EEG studies have had severely limited trial lengths traditionally.

377

378 Furthermore, our stage-by-stage analysis might contribute to disentangling competing theories. For  
379 example, our results suggest that the decision is made and evaluated in the last two stages. We  
380 interpreted the penultimate stage as a decision process in which memories are transferred to parietal  
381 areas by coordinating left-temporal regions with parietal regions, mediated by local frontal and  
382 fronto-parietal coordination [15,23,25,27]. The last stage has been traditionally related with a pure  
383 motor response. However, our results indicate that the motor stage has elements associated with  
384 motor preparation, action reevaluation, decision, and cognitive control [26,28,34]. This functional  
385 network in the last stage suggests that during the motor stage the decision is reevaluated, and it  
386 supports the line of thought in which responding is a process that is not independent from decision  
387 making (e.g., [28,35]).

388

## 389 **Conclusion**

390 To the best of our knowledge we have developed the first generative large-scale brain model that  
391 simulates the dynamics of the states of neural coordination along the fundamental cognitive stages  
392 in a task. In this model we have integrated structural connectivity, macroscopic neural dynamics,  
393 sub-cortical inputs, and the cognitive theories of associative recognition memory. The model has  
394 multiple simplifying assumptions which made it feasible to simulate and optimize the model while  
395 taking into account the macroscopic properties of neural anatomy and dynamics. This work opens

396 up the way for considering other tasks in similarly integrated and multidimensional manners to  
397 better understand how the brain implements cognition through cortical coordination.

398

## 399 **Methods**

### 400 **Experimental paradigm**

401 We re-analyzed MEG data from an associative memory task [3]. We combined the trials with  
402 correct responses from all experimental conditions, as we were interested in the transition between  
403 fundamental cognitive stages and not in the differences between conditions (which did all proceed  
404 through the same stages; [15]). All 18 participants were right handed (6 males and 12 females with a  
405 mean age of 23.6 years).

406

407 First, participants studied 32 pairs of words until they knew them well [3]. This was followed by a  
408 test session in which MEG was recorded. In the test session participants were presented with pairs  
409 of words which were either the same as in the study session (*targets*) or paired differently (*re-paired*  
410 *foils*). The pairs of words remained on the screen until the participant responded, and were followed  
411 by 1-sec feedback and a brief inter-trial interval. A full description of the task and the recording  
412 procedure can be found in [3].

413

### 414 **MEG data preprocessing**

415 MEG data was preprocessed and source-reconstructed following the analysis pipeline of the original  
416 manuscript [3]. After artifact rejection there were 6,708 trials left. The MEG data of each participant  
417 was combined with their own structural MRI to obtain the cortical sources of MEG data. MEG  
418 sources consisted of 5,024 dipoles estimated with cortically constrained minimum norm estimates

419 [3,51]. Source estimates were then morphed onto the standard MNI brain and parcellated into 68  
420 cortical regions with the Desikan-Killiany atlas [24,52]. Each parcel contained the average activity  
421 of all dipoles within the region with a 100 Hz sampling rate.

422

### 423 **Identification of cognitive stages**

424 To find the onset of cognitive stages the data were bandpass filtered (1-30 Hz, which are default  
425 values in Field Trip [53]) and epoched from trial onset to response. Single trials were baseline  
426 corrected (-0.4 to 0 seconds), and transformed to one covariance matrix per subject. The average  
427 covariance matrix across subjects was used to reduce the dimensionality of the data to 33 principal  
428 components (which together accounted for 90 % of variance). These principal components were z-  
429 scored and fed into the HSMM-MVPA. The HSMM-MVPA first applies a half-sine window  
430 function to increase the signal-to-noise ratio of the *bumps*, the cortical response to sub-cortical  
431 input. The bumps are assumed to be 50-millisecond modulations of amplitude at the onset of  
432 cognitive stages with the same topology across trials. The signals from the end of a bump to the  
433 next bump are assumed to have zero-mean amplitude, a *flat*. The duration of a given stage (bump +  
434 flat) is assumed to come from a gamma distribution with shape parameter equal to two.  
435 Consequently, a stage is modeled as a bump of a certain amplitude followed by a zero-mean  
436 amplitude flat and a duration given by a gamma-2 distribution. There is one exception and this is  
437 the first stage (pre-visual encoding here) which does not start with a bump. With this stage model  
438 and a predefined number of stages, the Baum-Welch algorithm for HSMMs searches the amplitude  
439 and location of bumps that explain the z-scored principal components best [54]. The bump  
440 amplitudes (for the 33 PCA components) are the same for all trials and vary across stages. The  
441 temporal location of the bumps also varies across trials, but the resulting stage durations are  
442 constrained to gamma-2 distributions with one scale parameter per stage.

443



444 We explored models with 3 to 7 cognitive stages as previous studies have shown that this memory  
445 task consists of 5 to 6 stages [4,5,15]. For each model we ran the HSMM-MVPA 200 times with  
446 random initial parameters to avoid converging in local maxima. We used a leave-one-subject-out  
447 cross-validation to assess whether a model with  $N+1$  stages could explain the data significantly  
448 better (using a sign-test) than a model with  $N$  stages [15]. The final model was the simplest one that  
449 generalized across subjects – a five-stage model. Then, we allowed one stage to have different  
450 gamma-scale parameters across experimental conditions, and we used leave-one-subject-out cross-  
451 validation to decide on the best model. As in previous studies [4,15], a model with different gamma  
452 distributions in the retrieval stage explained the MEG data best.

453

#### 454 **Measurements of neural coordination**

455 To measure neural coordination – local synchrony and directed functional connectivity – we used  
456 the analytic signal of theta band oscillations. The parcellated MEG data were band pass filtered  
457 (cut-off frequencies: 3.8, and 8.5 Hz; forward-backward IIR Butterworth filter of order 4) and  
458 epoched from -0.4 seconds before stimulus onset to 0.4 seconds after the response. Epochs were  
459 Hilbert transformed to the analytic signal using a symmetric padding of 0.4 seconds to avoid edge  
460 artifacts.

461

462 Directed functional connectivity between regions  $i$  and  $j$  was measured with the directed phase-lag  
463 index (dpFC) [32] as follows:

464

$$465 \quad dpFC^{ij} = \frac{1}{N} \sum_{n=1}^N \frac{1}{T_n} \sum_{t=s+1}^{s+T_n} \text{sgn}(\text{Im}(S_{nt}^{ij})) \quad \text{Eq. 1}$$

466

467 In Eq. 1,  $Im(S^{ij})$  is the imaginary part of the cross-spectral density, and  $sgn$  is the sign function. To  
468 compute within-stage dpFC,  $s+1$  was the first sample 0.05 seconds after the onset of the stage,  $T_n$   
469 was the length of the stage in trial  $n$ , and  $N$  is the number of trials. Across-trials dpFC was  
470 computed sample-by-sample with  $T_n = 1$  and time-locked to stage onset. Both within-stage and  
471 across-trial dpFC were later averaged across subjects. A detailed explanation can be found in the SI.  
472

### 473 **Generative whole-brain model**

474 The generative whole-brain model (GWBM) was derived with the Ott-Antonsen ansatz [55] from a  
475 network-of-networks of Kuramoto oscillators [36]. See [17] for a step-by-step derivation. The  
476 dynamics of synchrony in a region are given by the Kuramoto order parameter (KOP) which  
477 describes the dynamics of synchrony in biological systems as well as a pool of neurons [56]. The  
478 KOP is a complex number ( $KOP = r e^{i\psi}$ ) with the modulus bound by zero (asynchrony) and one  
479 (full synchrony). Here, the KOP simulated the analytic signal of the MEG data. Beforehand we set  
480 the natural frequencies of the oscillators to a Lorentzian distribution centered in the theta band  
481 (center,  $\Omega$ : 6 Hz, spread,  $\Delta$ : 1), and the spike-propagation velocity along the structural fibers to 5  
482 m/s. The equations of the KOP in on region,  $i$ , of the GWBM are as follows:

483

$$484 \quad \dot{r}_i = -\Delta_i r_i + \frac{L_i}{2}(1 - r_i^2)r_i + \frac{G}{2R}(1 - r_i^2) \sum_{j=1, j \neq i}^R A_{ij} r_j(t - \tau_{ij}) \cos(\psi_j(t - \tau_{ij}) - \psi_i) \quad \text{Eq. 2}$$

$$485 \quad \dot{\psi}_i = \Omega_i + \frac{G}{2R} \left( r_i + \frac{1}{r_i} \right) \sum_{j=1, j \neq i}^R A_{ij} r_j(t - \tau_{ij}) \sin(\psi_j(t - \tau_{ij}) - \psi_i) \quad \text{Eq. 3}$$

486

487 The time dependency has been removed in variables without time delays;  $\tau$  are the time delays  
488 between regions (fiber length x spike-propagation velocity);  $A$  is the coupling strength between

489 regions (density of structural fibers); and  $R$  is the number of regions. To simulate resting state  
490 dynamics we explored parameters  $G$  (global scaling of structural connectivity) and  $L$  (local  
491 connectivity strength, same in all regions) with 25 randomly initialized models. The results of this  
492 exploration are shown in SI Figure 1. With  $G$  and  $L$  set to correctly reproducing the resting state, the  
493 thalamocortical inputs were simulated as 0.03 second increases/decreases of  $L$  at each region and  
494 stage onset independently. Simulated dpFC was measured with Eq. 1, but here  $N$  represented 25  
495 models with different initial conditions and  $T_n$  was the median duration of the MEG stages. The  
496 initial conditions for the first stage were the MEG phases and amplitudes at the pre-encoding stage  
497 plus random noise. More details of the simulations are reported in the SI.

498

#### 499 **Generative whole-brain model: Resting-state**

500 To identify a GWBM that simulated resting-state dynamics we performed a grid-search over the  
501 global and local coupling parameter space. The local couplings were assumed to be identical for all  
502 regions. Resting-state dynamics are characterized by temporal fluctuations of global and local  
503 synchrony, and time-resolved patterns of functional connectivity (i.e. metastable dynamics).  
504 Metastability was measured as the standard deviation of the modulus of the KOP over time at local  
505 and global levels [57,58]. At the local level, the metastabilities were averaged across regions. To  
506 obtain the global KOP over time we averaged the phases of the local KOPs across regions ( $\psi$  in  
507 Equation 3 of the main text). To assess the temporal structure of the global metastability we  
508 computed the mean of the absolute values of its autocorrelation function. To avoid the influence of  
509 the initial conditions on the simulations we ran twenty-five GWBMs with random initial conditions  
510 for each combination of parameters. The simulations were run for 1000 seconds, but the initial 200  
511 seconds were removed to discard initial transients. All simulations were performed with a time-  
512 delayed first-order Euler method and an integration step of 1 millisecond. We ended up with a  
513 global coupling of 0.15 and a local coupling of 0.7, which had the best trade-off between high

514 metastability and low autocorrelation of global KOP, and therefore were chosen as the default  
515 values for the following GWBMs. Supplementary Figure 1 shows the grid search results of resting-  
516 state dynamics.

517

## 518 **Generative whole-brain model: cognitive task**

519 To simulate the sequence of cognitive stages and their associated neural coordination patterns, we  
520 initialized 25 models informed by the theta-band phases and envelope amplitudes observed at the  
521 pre-encoding stage. The MEG envelopes were measured 0.1 and 0.05 seconds before the onset of  
522 the encoding stage. Then, the initial history of the KOP modulus was a straight line that joined the  
523 mean of these amplitudes across trials plus Gaussian noise ( $\sigma=0.01$ ). To choose the initial history of  
524 phases we measured inter-trial phase consistency, and within-stage dpFC at the pre-encoding stage.  
525 There were 10 regions (mostly occipital and parietal) that showed significant inter-trial phase  
526 consistency. The initial history of phases at these regions were set to the average MEG phases  
527 across trials at 0.05 seconds before the onset of the first stage plus Gaussian noise ( $\sigma=0.01$ ). The  
528 phases of these regions were used as a referent point for the remaining regions. The initial phases of  
529 the remaining regions were set by an optimization algorithm (CMAES [59]) which tried to establish  
530 a phase-lag relationship between regions as in the empirical within-stage dpFC. The dpFC of the  
531 initial history of phases had an average similarity to empirical within-stage dpFC of 78%. The 25  
532 GWBMs of the later stages were initialized with the last simulated samples of the previous stage in  
533 the best individual of the optimization process (see section *Optimization of thalamocortical inputs*).

534

535 The model with the best fitting sequence of parameters was left to run 400 seconds after the last  
536 stage. Supplementary Figure 2 shows that the model neither remained trapped into the functional  
537 connectivity state of the last stage, nor did it return to any of the previous states (SI Fig. 2, bottom).

538 Instead, the model returned to resting state patterns of global and local synchrony for which the  
539 functional connectivity fluctuated over time (i.e. metastable dynamics; SI Fig. 2, top & middle).

540

## 541 **Optimization of thalamocortical inputs**

542 To find the optimal thalamocortical inputs for reproducing the observed connectivity patterns, we  
543 used the generalized island model for evolutionary optimization [44] – algorithm DE1220 as  
544 implemented in the pagmo toolbox [60]. The generalized island model optimized in parallel ten  
545 islands connected in a ring. Each island consisted of 50 individuals and had a particular  
546 parametrization of a differential evolution algorithm (see *Supplementary Table 1*). The islands  
547 occasionally exchanged their best-fitted individuals. This configuration allowed for simultaneously  
548 exploring and exploiting multiple areas of the parameter space. Their fitness function had three  
549 objectives that were combined into one index of fitness. The dominant objective was to maximize  
550 the similarity of simulated and empirical within-stage dpFC,  $f_1$ :

551

$$552 \quad f_1 = \frac{\sum_{i=1}^E x_i \cdot y_i}{\left(\sum_{i=1}^E |x_i|\right)^{-1}} \quad \text{Eq. 4}$$

553

554 The links,  $E$ , in the empirical dpFC,  $x$ , were either 0 (not significant), 1 (lag-ahead) or -1 (lag-  
555 behind). Simulated dpFC links,  $y$ , were either -1 or 1. The objective  $f_1$  gave discrete values which  
556 interval was used by the other two objectives. The second objective,  $f_2$ , maximized the topological  
557 similarity of the relative change in envelope amplitude at the onset of each stage. This similarity  
558 was measured with the Spearman rank-correlation between MEG and simulated relative amplitudes.  
559 The third objective,  $f_3$ , minimized the absolute size of the thalamic pulses as

560

561 
$$f_3 = \frac{1}{L_{max}} \sum_{j=1}^R |L_j| \left( \sum_{i=1}^E |x_i| \right)^{-1} \quad \text{Eq. 5}$$

562

563 where  $L_i$  are the local connectivities, and  $L_{max}$  is the largest absolute pulse allowed to the optimizers.

564 The combined fitness index was  $f = f_1 - (1-f_2)f_3$ . The best individual had the minimal  $(1-f_2)f_3$  among

565 the 5000 individuals with the highest  $f$  in order to avoid a GWBM with low  $f_2$  and  $f_3$ . The last

566 simulated samples of this individual were used to initialize the simulations of the next stage (see

567 section *Generative whole-brain model: Cognitive task*).

568

569 Supplementary Figure 3 shows the parameters of the individuals and their fitness along the

570 evolution in one island as example. This figure shows how the cost function could simultaneously

571 maximize the fitness of within-stage dpFC and relative local synchrony at the onset (Spearman

572 correlation), while the change in local coupling was minimized. The optimization of the four stages

573 took approximately 4 days using 10 CPUs, one for each island.

574

## 575 **Relevance of individual regions for switches**

576 To assess the relevance of a region for switching between states of dpFC, a GWBM was lesioned by

577 setting the thalamocortical pulse in this region to zero while the remaining regions were left

578 untouched. Then, the fitness of the lesioned GWBM (Eq. 4) was compared to the fitness achieved

579 by the original GWBM. The relevance of a region was measured as the number of within-stage

580 dpFC links in the lesioned model that were not matching MEG data relative to the number of links

581 matching MEG data in the full model. This process for measuring relevance was repeated for the 68

582 regions in the GWBM and the four transitions between stages. To obtain a measure of relevance that

583 was not dependent on a single GWBM, relevance was evaluated in 1,000 GWBMs randomly picked

584 from among the models in the top one percentile after optimization. Next, we used linear regions

585 models with one independent variable to explain the relevance of regions. Each linear model  
586 included as dependent variable the relevance of the 68 regions and four stages in a lesioned  
587 GWBM. A linear model was fitted for each of the 1,000 lesioned models independently.

588

## 589 **Structural connectivity, MRI acquisition and processing**

590 We used 45 subjects from the test-retest dataset of the Human Connectome Project (HCP) 3T. This  
591 data set consisted of T1-weighted and multi-shell diffusion MRI data. T1-weighted data were  
592 acquired with 0.7 mm isotropic voxel size, TE = 2.14 ms, and TR = 2400 ms. Diffusion MRI data  
593 were acquired with a 1.25-mm isotropic voxel size, TE = 89.5 ms, and TR 5520 ms, with three  
594 shells with  $b = 1000, 2000, \text{ and } 3000 \text{ s/mm}^2$ , each shell with 90 diffusion weighted volumes and 6  
595 non-weighted images [61]. The diffusion MRI data was already preprocessed as described in [62].  
596 In short, diffusion MRI data were corrected for head motion and geometrical distortions arising  
597 from eddy currents and susceptibility artifacts [63]. Finally, the diffusion MRI images were aligned  
598 to the structural T1 image. The T1w image was parcellated using the Desikan–Killany parcellation  
599 [24], resulting in 68 cortical ROIs. Using the T1w image, the probability maps of the different  
600 tissues were obtained to create the five tissue-type files [64,65].

601

602 Tractography was carried out with constrained spherical deconvolution [66,67]. A multi-tissue re-  
603 sponse function was calculated [68] and the average response functions were calculated. The multi-  
604 tissue fiber orientation distribution was calculated [69] with the average response function ( $L_{max} =$   
605 8). The fiber orientation distribution images had a joint bias field correction and a multi-tissue in-  
606 formed log-domain intensity normalization [70]. Then, tractography was performed with the iFOD2  
607 algorithm [71] using anatomically constrained tractography [72]; generating 10 million streamlines  
608 (cutoff at 0.05, default); and using backtracking [72] and a dynamic seeding [73]. The length of the

609 fibers was set to a minimum of 20 mm and a maximum of 250 mm [72]. To be able to quantitatively  
610 assess the connectivity, SIFT2 was applied to the resulting tractograms [73].

611

612 The connectivity matrix was built with a robust approach. In particular a 2-mm radial search at the  
613 end of the streamline was performed to allow the tracts to reach the gray matter parcellation [74].

614 Each connectivity matrix was multiplied by its  $\mu$  coefficient obtained from the SIFT2 process, as the  
615 sum of the streamline weights needs to be proportional to the units of fiber density for each subject

616 [75]. Connectivity matrices were averaged across subjects, and the 10% of links with the highest

617 coefficient of variation across subjects were set to zero[76]. Finally, the averaged and thresholded

618 structural connectivity matrix was normalized to have an average value of one.

619

## 620 **Supplementary Information**

621 **Supplementary Table 1.** *Parameters of DE1220 algorithm on each island.*

| Island<br>IDs | Mutation variants allowed                                      | Adaptation scheme for<br>parameters $F$ and $C$ |
|---------------|----------------------------------------------------------------|-------------------------------------------------|
| 1             | best/1/exp; rand-to-best/1/exp; best/1/bin; rand-to-best/1/bin | jDE                                             |
| 2             | rand-to-current/2/exp; rand-to-current/2/bin                   | jDE                                             |
| 3             | rand-to-current/2/exp; rand-to-current/2/bin                   | iDE                                             |
| 4             | best/1/exp; rand-to-best/1/exp; best/1/bin; rand-to-best/1/bin | iDE                                             |
| 5             | rand/1/exp; rand/1/bin                                         | jDE                                             |
| 6             | rand-to-current/2/exp; rand-to-current/2/bin                   | jDE                                             |
| 7             | rand-to-current/2/exp; rand-to-current/2/bin                   | iDE                                             |
| 8             | best/1/exp; rand-to-best/1/exp; best/1/bin; rand-to-best/1/bin | jDE                                             |
| 9             | best/1/exp; rand-to-best/1/exp; best/1/bin; rand-to-best/1/bin | iDE                                             |
| 10            | rand/1/exp; rand/1/bin                                         | jDE                                             |

622

623

624



625 **Supplementary Figures**

626

627

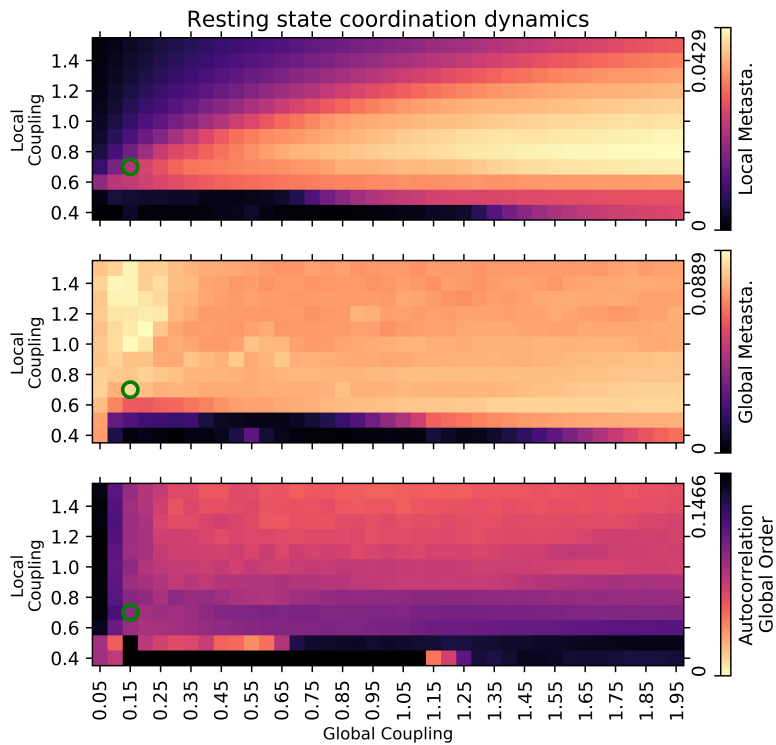

**Figure S1, Resting state neural coordination dynamics.** The green dot indicates the parametrization of the model. The location of the green dot was based on the idea that resting state dynamics should have simultaneously the lightest color in the three panels and the weakest coupling parameters.

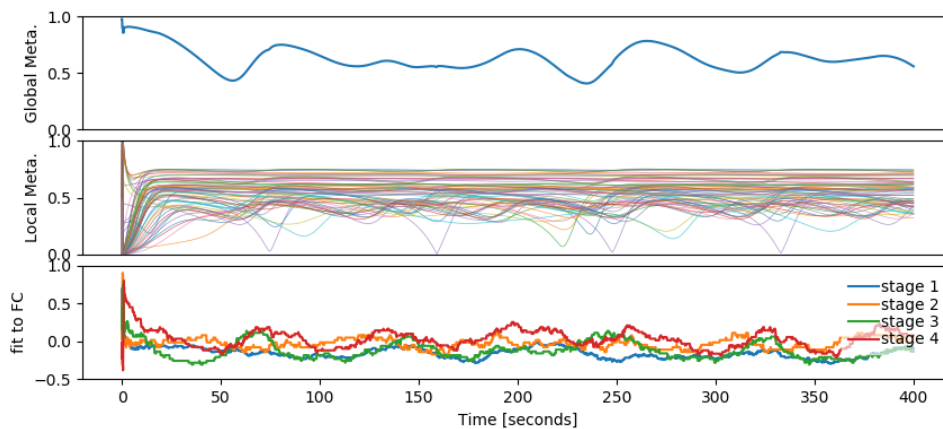

**Figure S2. Return to resting-state after cognitive stages.** (top) Modulus of the global KOP.

(middle) Modulus of the local Kuramoto order parameter (KOP) for the cortical 68 ROIs. (bottom)

Temporal evolution of simulated-to-MEG fitness of *within-stage dpFC* for the four cognitive stages.

This is similar to Figure 2B but for a much longer period of time. The MEG *within-stage dpFC* of

each stage (Figure 1B) were compared (Eq. 4) with the simulated *dpFC* sample-by-sample (Eq. 1).

628

629

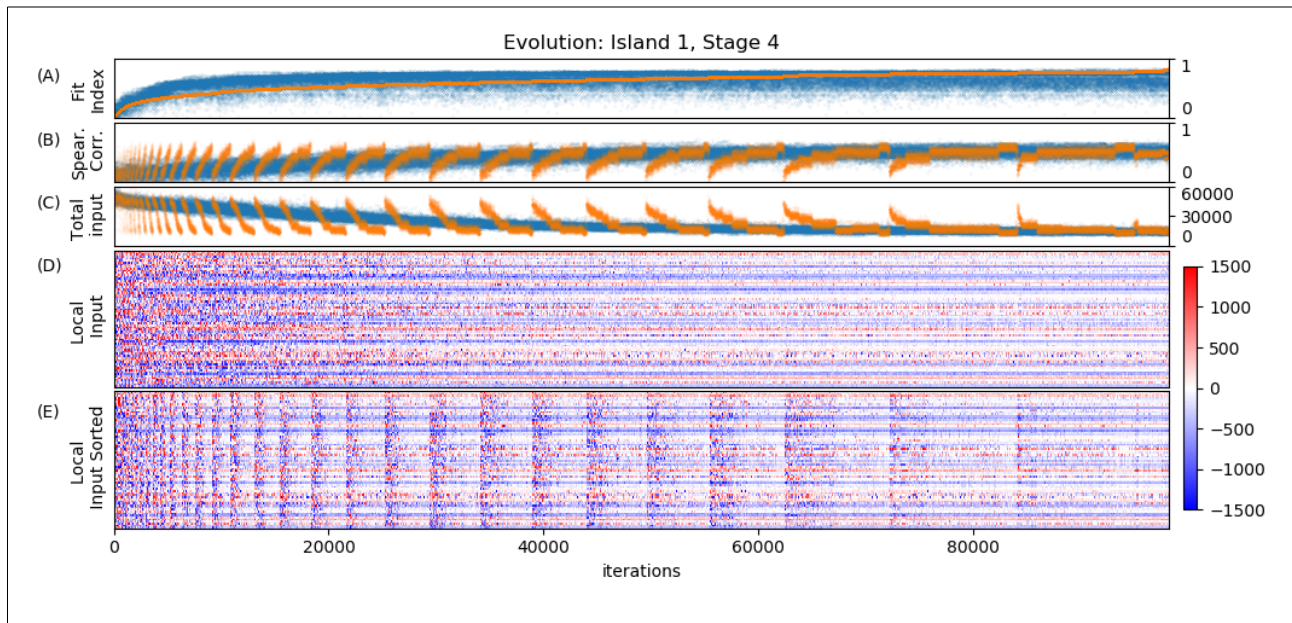

**Figure S3. Individuals and their fitness along the optimization in one island.** (A) fitness index

$f$ . (B) Spearman correlation, objective  $f$ . (C) Sum of the absolute change in local coupling at the

onset of the stage. Blue dots are the A, B and C values in the order that they were evaluated along

the optimization process. Orange dots are the same values but sorted by the Fit Index (A). (D)

Change in local coupling (thalamic input) at the onset that produces the blue dots in A, B, C. (E)

Same as (D) but sorted by their Fit Index.

630

631

## 632 **Acknowledgments**

633 The work of Cao was supported in part by the European Research Council (ERC-CoG-771687).

634 HCP datasets were provided by the Human Connectome Project, WU-Minn Consortium (Principal

635 Investigators: David Van Essen and Kamil Ugurbil; 1U54MH091657) funded by the 16 NIH

636 Institutes and Centers that support the NIH Blueprint for Neuroscience Research; and by the

637 McDonnell Center for Systems Neuroscience at Washington University. We thank Lionel Newman

638 from the University of Groningen for proofreading the manuscript.

639

## 640 **Author contributions**

Oscar Portoles: Designed research, Performed research, Analysed data, Wrote the paper

Manuel Blesa: Analysed and wrote structural data processing

Marieke van Vugt: Contributed in writing

Ming Cao: Contributed in writing

Jelmer P. Borst: Designed research, Wrote the paper

## 641 **Competing Interests**

The authors declare no conflict of interest

642

## 643 **References**

1. Donders FC. On the speed of mental processes. *Acta Psychol (Ams)*. 1969;30: 412–431. doi:10.1016/0001-6918(69)90065-1
2. Sternberg S. The discovery of processing stages: Extensions of Donders' method. *Acta Psychologica*. 1969;30: 276–315. doi:10.1016/0001-6918(69)90055-9
3. Borst JP, Ghuman AS, Anderson JR. Tracking cognitive processing stages with MEG: A spatio-temporal model of associative recognition in the brain. *NeuroImage*. 2016;141: 416–430. doi:10.1016/j.neuroimage.2016.08.002

4. Portoles O, Borst JP, van Vugt MK. Characterizing synchrony patterns across cognitive task stages of associative recognition memory. *Eur J Neurosci*. 2018;48: 2759–2769. doi:10.1111/ejn.13817
5. Anderson JR, Borst JP, Fincham JM, Ghuman AS, Tenison C, Zhang Q. The Common Time Course of Memory Processes Revealed. *Psychol Sci*. 2018;29: 1463–1474. doi:10.1177/0956797618774526
6. Stocco A, Lebiere C, Anderson JR. Conditional routing of information to the cortex: A model of the basal ganglia's role in cognitive coordination. *Psychol Rev*. 2010;117: 541–574. doi:10.1037/a0019077
7. O'Reilly RC, Frank MJ. Making working memory work: a computational model of learning in the prefrontal cortex and basal ganglia. *Neural Comput*. 2006;18: 283–328. doi:10.1162/089976606775093909
8. Redgrave P, Prescott TJ, Gurney K. The basal ganglia: a vertebrate solution to the selection problem? *Neuroscience*. 1999;89: 1009–1023. doi:10.1016/s0306-4522(98)00319-4
9. Hwang K, Bertolero MA, Liu WB, D'Esposito M. The Human Thalamus Is an Integrative Hub for Functional Brain Networks. *J Neurosci*. 2017;37: 5594–5607. doi:10.1523/JNEUROSCI.0067-17.2017
10. Bruno RM, Sakmann B. Cortex Is Driven by Weak but Synchronously Active Thalamocortical Synapses. *Science*. 2006;312: 1622–1627. doi:10.1126/science.1124593
11. Rektor I, Bareš M, Brázdil M, Kaňovský P, Rektorová I, Sochůrková D, et al. Cognitive- and movement-related potentials recorded in the human basal ganglia. *Mov Disord*. 2005;20: 562–568. doi:https://doi.org/10.1002/mds.20368
12. Cruikshank SJ, Lewis TJ, Connors BW. Synaptic basis for intense thalamocortical activation of feedforward inhibitory cells in neocortex. *Nat Neurosci*. 2007;10: 462–468. doi:10.1038/nn1861
13. Malekmohammadi M, Elias WJ, Pouratian N. Human thalamus regulates cortical activity via spatially specific and structurally constrained phase-amplitude coupling. *Cereb Cortex*. 2015;25: 1618–1628. doi:10.1093/cercor/bht358
14. Saalman YB. Intralaminar and medial thalamic influence on cortical synchrony, information transmission and cognition. *Front Syst Neurosci*. 2014;8. doi:10.3389/fnsys.2014.00083
15. Anderson JR, Zhang Q, Borst JP, Walsh MM. The discovery of processing stages: Extension of Sternberg's method. *Psychol Rev*. 2016;123: 481–509. doi:10.1037/rev0000030
16. Tewarie P, Hunt BAE, O'Neill GC, Byrne A, Aquino K, Bauer M, et al. Relationships Between Neuronal Oscillatory Amplitude and Dynamic Functional Connectivity. *Cerebral Cortex*. 2019;29: 2668–2681. doi:10.1093/cercor/bhy136
17. Portoles O, Qin Y, Hadida J, Woolrich M, Cao M, Vugt M van. Modulations of local synchrony over time lead to resting-state functional connectivity in a parsimonious large-scale brain model. *bioRxiv*. 2021; 2021.01.20.427443. doi:10.1101/2021.01.20.427443

18. Zhang Q, Walsh MM, Anderson JR. The Impact of Inserting an Additional Mental Process. *Comput Brain Behav.* 2018;1: 22–35. doi:10.1007/s42113-018-0002-8
19. Cabral J, Kringelbach ML, Deco G. Functional connectivity dynamically evolves on multiple time-scales over a static structural connectome: Models and mechanisms. *NeuroImage.* 2017;160: 84–96. doi:10.1016/j.neuroimage.2017.03.045
20. Tognoli E, Kelso JAS. The Metastable Brain. *Neuron.* 2014;81: 35–48. doi:10.1016/j.neuron.2013.12.022
21. Wang L-Z, Su R-Q, Huang Z-G, Wang X, Wang W-X, Grebogi C, et al. A geometrical approach to control and controllability of nonlinear dynamical networks. *Nat Commun.* 2016;7: 11323. doi:10.1038/ncomms11323
22. Anderson JR. How can the human mind occur in the physical universe? Oxford ; New York: Oxford University Press; 2007.
23. Staresina BP, Wimber M. A Neural Chronometry of Memory Recall. *Trends Cogn Sci.* 2019;23: 1071–1085. doi:10.1016/j.tics.2019.09.011
24. Desikan RS, Ségonne F, Fischl B, Quinn BT, Dickerson BC, Blacker D, et al. An automated labeling system for subdividing the human cerebral cortex on MRI scans into gyral based regions of interest. *Neuroimage.* 2006;31: 968–980. doi:10.1016/j.neuroimage.2006.01.021
25. Cavanagh JF, Frank MJ. Frontal theta as a mechanism for cognitive control. *Trends Cogn Sci.* 2014;18: 414–421. doi:10.1016/j.tics.2014.04.012
26. Sauseng P, Griesmayr B, Freunberger R, Klimesch W. Control mechanisms in working memory: a possible function of EEG theta oscillations. *Neurosci Biobehav Rev.* 2010;34: 1015–1022. doi:10.1016/j.neubiorev.2009.12.006
27. Rajan A, Siegel SN, Liu Y, Bengson J, Mangun GR, Ding M. Theta Oscillations Index Frontal Decision-Making and Mediate Reciprocal Frontal–Parietal Interactions in Willed Attention. *Cereb Cortex.* 2019;29: 2832. doi:10.1093/cercor/bhy149
28. Pellegrino G, Tomasevic L, Herz DM, Larsen KM, Siebner HR. Theta Activity in the Left Dorsal Premotor Cortex During Action Re-Evaluation and Motor Reprogramming. *Front Hum Neurosci.* 2018;12. doi:10.3389/fnhum.2018.00364
29. Canolty RT, Edwards E, Dalal SS, Soltani M, Nagarajan SS, Kirsch HE, et al. High Gamma Power Is Phase-Locked to Theta Oscillations in Human Neocortex. *Science.* 2006;313: 1626–1628. doi:10.1126/science.1128115
30. Voloh B, Womelsdorf T. A Role of Phase-Resetting in Coordinating Large Scale Neural Networks During Attention and Goal-Directed Behavior. *Front Syst Neurosci.* 2016;10. doi:10.3389/fnsys.2016.00018
31. Ketz NA, Jensen O, O’Reilly RC. Thalamic pathways underlying prefrontal cortex-medial temporal lobe oscillatory interactions. *Trends Neurosci.* 2015;38: 3–12. doi:10.1016/j.tins.2014.09.007
32. Stam CJ, van Straaten ECW. Go with the flow: Use of a directed phase lag index (dPLI) to

- characterize patterns of phase relations in a large-scale model of brain dynamics. *NeuroImage*. 2012;62: 1415–1428. doi:10.1016/j.neuroimage.2012.05.050
33. Reinhart RMG. Working memory revived in older adults by synchronizing rhythmic brain circuits. *Nat Neurosci.* : 16.
  34. Hartwigsen G, Siebner HR. Joint Contribution of Left Dorsal Premotor Cortex and Supramarginal Gyrus to Rapid Action Reprogramming. *Brain Stimul.* 2015;8: 945–952. doi:10.1016/j.brs.2015.04.011
  35. Gallivan JP, Chapman CS, Wolpert DM, Flanagan JR. Decision-making in sensorimotor control. *Nat Rev Neurosci.* 2018;19: 519–534. doi:10.1038/s41583-018-0045-9
  36. Skardal PS, Restrepo JG. Hierarchical synchrony of phase oscillators in modular networks. *Phys Rev E.* 2012;85: 016208. doi:10.1103/PhysRevE.85.016208
  37. Breakspear M, Heitmann S, Daffertshofer A. Generative Models of Cortical Oscillations: Neurobiological Implications of the Kuramoto Model. *Front Hum Neurosci.* 2010;4. doi:10.3389/fnhum.2010.00190
  38. Maistrenko YL, Lysyansky B, Hauptmann C, Burylko O, Tass PA. Multistability in the Kuramoto model with synaptic plasticity. *Phys Rev E.* 2007;75: 066207. doi:10.1103/PhysRevE.75.066207
  39. Deco G, Cabral J, Woolrich MW, Stevner ABA, van Hartevelt TJ, Kringelbach ML. Single or multiple frequency generators in on-going brain activity: A mechanistic whole-brain model of empirical MEG data. *NeuroImage.* 2017;152: 538–550. doi:10.1016/j.neuroimage.2017.03.023
  40. Saalmann YB, Pinsk MA, Wang L, Li X, Kastner S. The Pulvinar Regulates Information Transmission Between Cortical Areas Based on Attention Demands. *Science.* 2012;337: 753–756. doi:10.1126/science.1223082
  41. Sherman SM. The thalamus is more than just a relay. *Curr Opin Neurobiol.* 2007;17: 417–422. doi:10.1016/j.conb.2007.07.003
  42. Ramcharan EJ, Gnadt JW, Sherman SM. Higher-order thalamic relays burst more than first-order relays. *Proc Natl Acad Sci USA.* 2005;102: 12236–12241. doi:10.1073/pnas.0502843102
  43. Kloc M, Maffei A. Target-Specific Properties of Thalamocortical Synapses onto Layer 4 of Mouse Primary Visual Cortex. *J Neurosci.* 2014;34: 15455–15465. doi:10.1523/JNEUROSCI.2595-14.2014
  44. Izzo D, Ruciński M, Biscani F. The Generalized Island Model. Parallel Architectures and Bioinspired Algorithms. 2012; 151–169. doi:10.1007/978-3-642-28789-3\_7
  45. Behrens TEJ, Johansen-Berg H, Woolrich MW, Smith SM, Wheeler-Kingshott C a. M, Boulby PA, et al. Non-invasive mapping of connections between human thalamus and cortex using diffusion imaging. *Nat Neurosci.* 2003;6: 750–757. doi:10.1038/nn1075
  46. Qin Y, Kawano Y, Portoles O, Cao M. Partial Phase Cohesiveness in Networks of Networks of Kuramoto Oscillators. *IEEE Trans Automat Contr.* 2021; 1–1. doi:10.1109/TAC.2021.3062005



47. Nicosia V, Valencia M, Chavez M, Díaz-Guilera A, Latora V. Remote Synchronization Reveals Network Symmetries and Functional Modules. *Phys Rev Lett*. 2013;110: 174102. doi:10.1103/PhysRevLett.110.174102
48. Petkoski S, Spiegler A, Proix T, Aram P, Temprado J-J, Jirsa VK. Heterogeneity of time delays determines synchronization of coupled oscillators. *Phys Rev E*. 2016;94: 012209. doi:10.1103/PhysRevE.94.012209
49. Vicente R, Gollo LL, Mirasso CR, Fischer I, Pipa G. Dynamical relaying can yield zero time lag neuronal synchrony despite long conduction delays. *Proc Natl Acad Sci USA*. 2008;105: 17157–17162. doi:10.1073/pnas.0809353105
50. Halgren M, Ulbert I, Bastuji H, Fabó D, Eróss L, Rey M, et al. The generation and propagation of the human alpha rhythm. *Proc Natl Acad Sci USA*. 2019;116: 23772–23782. doi:10.1073/pnas.1913092116
51. Gramfort A, Luessi M, Larson E, Engemann DA, Strohmeier D, Brodbeck C, et al. MNE software for processing MEG and EEG data. *NeuroImage*. 2014;86: 446–460. doi:10.1016/j.neuroimage.2013.10.027
52. Fischl B. FreeSurfer. *NeuroImage*. 2012;62: 774–781. doi:10.1016/j.neuroimage.2012.01.021
53. Oostenveld R, Fries P, Maris E, Schoffelen J-M. FieldTrip: Open Source Software for Advanced Analysis of MEG, EEG, and Invasive Electrophysiological Data. In: *Computational Intelligence and Neuroscience* [Internet]. Hindawi; 23 Dec 2010 [cited 10 Feb 2021] p. e156869. doi:<https://doi.org/10.1155/2011/156869>
54. Yu S-Z. Hidden semi-Markov models. *Artificial Intelligence*. 2010; 29.
55. Ott E, Antonsen TM. Low dimensional behavior of large systems of globally coupled oscillators. *Chaos*. 2008;18: 037113. doi:10.1063/1.2930766
56. Montbrió E, Pazó D, Roxin A. Macroscopic Description for Networks of Spiking Neurons. *Phys Rev X*. 2015;5: 021028. doi:10.1103/PhysRevX.5.021028
57. Wildie M, Shanahan M. Metastability and chimera states in modular delay and pulse-coupled oscillator networks. *Chaos*. 2012;22: 043131. doi:10.1063/1.4766592
58. Cabral J, Luckhoo H, Woolrich M, Joensson M, Mohseni H, Baker A, et al. Exploring mechanisms of spontaneous functional connectivity in MEG: how delayed network interactions lead to structured amplitude envelopes of band-pass filtered oscillations. *Neuroimage*. 2014;90: 423–435. doi:10.1016/j.neuroimage.2013.11.047
59. Hansen N. The CMA Evolution Strategy: A Comparing Review. : 28.
60. Biscani F, Izzo D. A parallel global multiobjective framework for optimization: pagmo. *Journal of Open Source Software*. 2020;5: 2338. doi:10.21105/joss.02338
61. Van Essen DC, Ugurbil K, Auerbach E, Barch D, Behrens TEJ, Bucholz R, et al. The Human Connectome Project: a data acquisition perspective. *Neuroimage*. 2012;62: 2222–2231. doi:10.1016/j.neuroimage.2012.02.018

62. Glasser MF, Sotiropoulos SN, Wilson JA, Coalson TS, Fischl B, Andersson JL, et al. The minimal preprocessing pipelines for the Human Connectome Project. *Neuroimage*. 2013;80: 105–124. doi:10.1016/j.neuroimage.2013.04.127
63. Sotiropoulos SN, Jbabdi S, Xu J, Andersson JL, Moeller S, Auerbach EJ, et al. Advances in diffusion MRI acquisition and processing in the Human Connectome Project. *Neuroimage*. 2013;80: 125–143. doi:10.1016/j.neuroimage.2013.05.057
64. Zhang Y, Brady M, Smith S. Segmentation of brain MR images through a hidden Markov random field model and the expectation-maximization algorithm. *IEEE Trans Med Imaging*. 2001;20: 45–57. doi:10.1109/42.906424
65. Patenaude B, Smith SM, Kennedy DN, Jenkinson M. A Bayesian model of shape and appearance for subcortical brain segmentation. *Neuroimage*. 2011;56: 907–922. doi:10.1016/j.neuroimage.2011.02.046
66. Tournier J-D, Calamante F, Connelly A. Robust determination of the fibre orientation distribution in diffusion MRI: Non-negativity constrained super-resolved spherical deconvolution. *NeuroImage*. 2007;35: 1459–1472. doi:10.1016/j.neuroimage.2007.02.016
67. Tournier J-D, Smith R, Raffelt D, Tabbara R, Dhollander T, Pietsch M, et al. MRtrix3: A fast, flexible and open software framework for medical image processing and visualisation. *Neuroimage*. 2019;202: 116137. doi:10.1016/j.neuroimage.2019.116137
68. Dhollander T, Raffelt D, Connelly A. Unsupervised 3-tissue response function estimation from single-shell or multi-shell diffusion MR data without a co-registered T1 image. 2016.
69. Jeurissen B, Tournier J-D, Dhollander T, Connelly A, Sijbers J. Multi-tissue constrained spherical deconvolution for improved analysis of multi-shell diffusion MRI data. *Neuroimage*. 2014;103: 411–426. doi:10.1016/j.neuroimage.2014.07.061
70. Raffelt D, Dhollander T, Tournier J-D, Tabbara R, Smith R, Pierre E, et al. Bias Field Correction and Intensity Normalisation for Quantitative Analysis of Apparent Fibre Density. 2017.
71. Tournier J-D, Calamante F, Connelly A. Improved probabilistic streamlines tractography by 2nd order integration over fibre orientation distributions. 2009 [cited 10 Feb 2021]. Available: /paper/Improved-probabilistic-streamlines-tractography-by-Tournier-Calamante/b4ffcb9ec889a8a68bffc46387a96b78a50ef94a
72. Smith RE, Tournier J-D, Calamante F, Connelly A. Anatomically-constrained tractography: improved diffusion MRI streamlines tractography through effective use of anatomical information. *Neuroimage*. 2012;62: 1924–1938. doi:10.1016/j.neuroimage.2012.06.005
73. Smith RE, Tournier J-D, Calamante F, Connelly A. SIFT2: Enabling dense quantitative assessment of brain white matter connectivity using streamlines tractography. *Neuroimage*. 2015;119: 338–351. doi:10.1016/j.neuroimage.2015.06.092
74. Smith RE, Tournier J-D, Calamante F, Connelly A. The effects of SIFT on the reproducibility and biological accuracy of the structural connectome. *Neuroimage*. 2015;104: 253–265. doi:10.1016/j.neuroimage.2014.10.004



75. Smith R, Raffelt D, Tournier J-D, Connelly A. Quantitative streamlines tractography: methods and inter-subject normalisation. OSF Preprints; 2020. doi:10.31219/osf.io/c67kn
76. Roberts JA, Perry A, Roberts G, Mitchell PB, Breakspear M. Consistency-based thresholding of the human connectome. *NeuroImage*. 2017;145: 118–129. doi:10.1016/j.neuroimage.2016.09.053

644

645
